# Supplementary material
Source: publisher site journal article supplement (https://www.dovepress.com/article/429969)
Supplement: Supplementary file 1 [file get_supplementary_file.php]

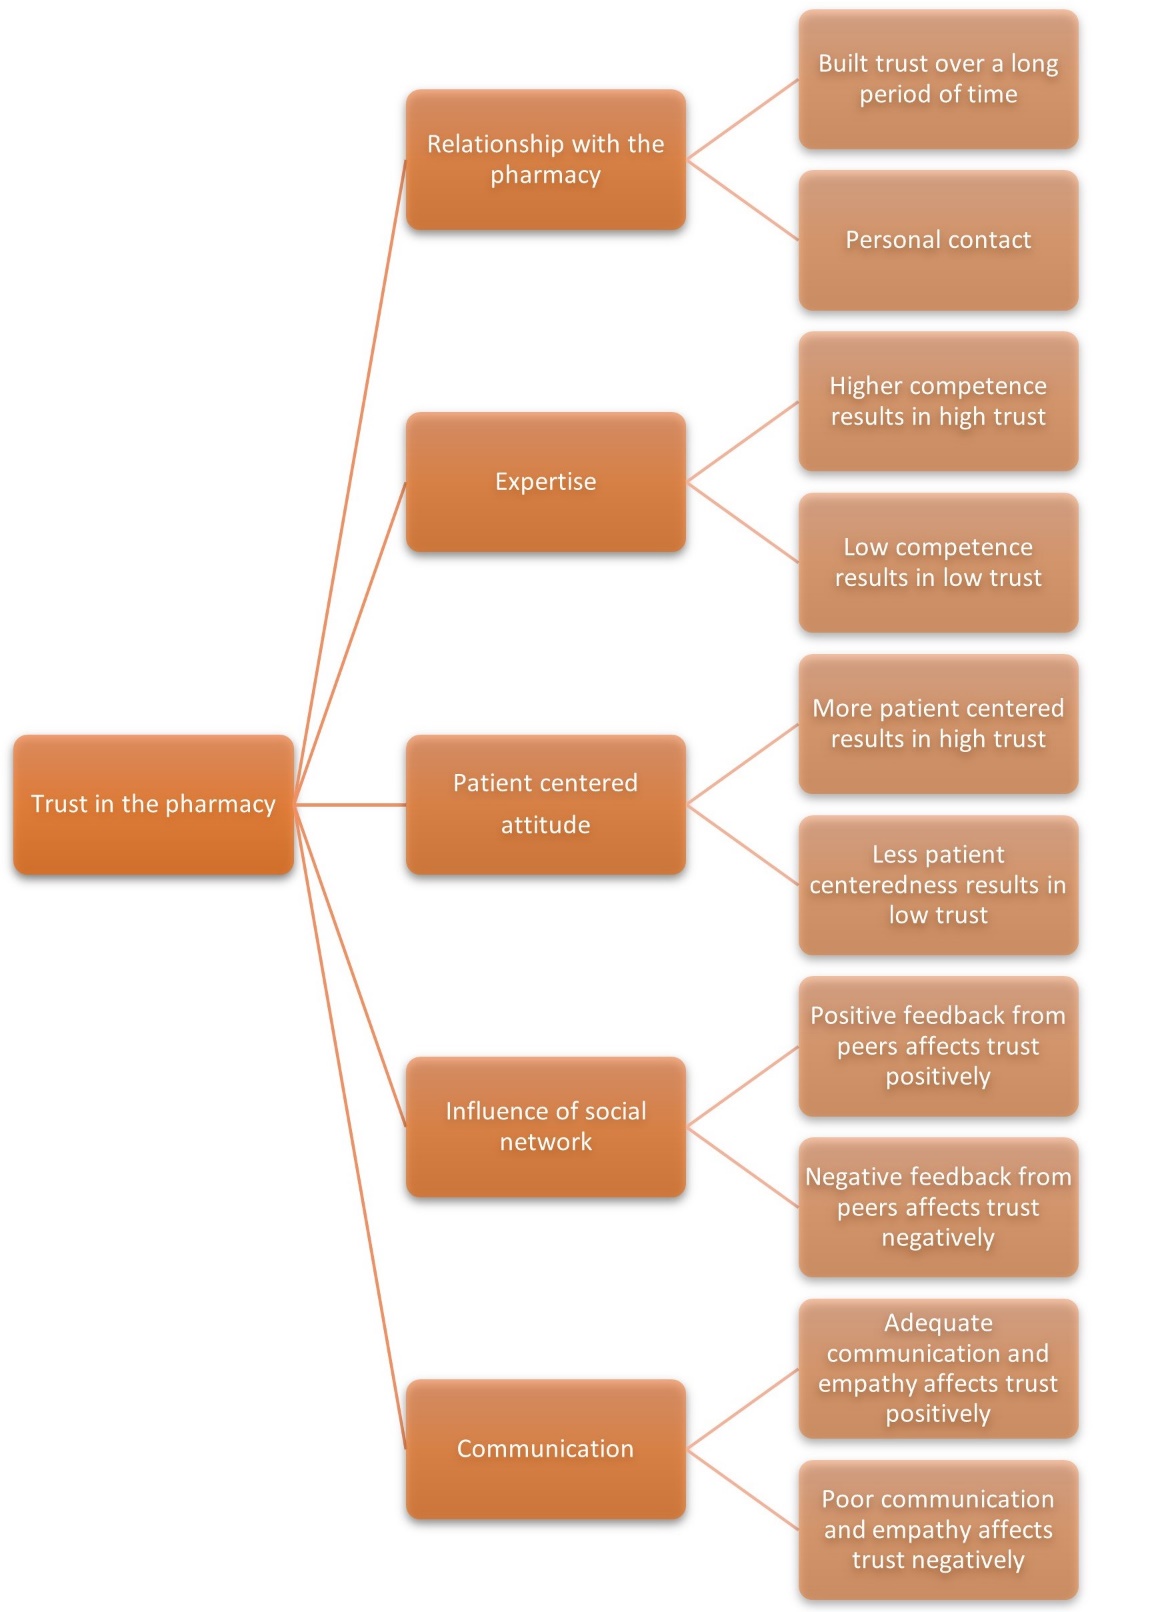


Supplementary Figure 1: Coding tree for analysing focus group data

Supplementary Table 1: Items of the questionnaire clustered in the ‘expertise’ domain

| **Expertise** | **Factor loading** |
| --- | --- |
| If I have questions about my respiratory medication, I ask someone from the pharmacy team first | 0.3950 |
| The pharmacy team would indicate when an error has been made | 0.6132 |
| The pharmacy team provides me with medications of the highest quality | 0.6401 |
| The team in the pharmacy are experts in respiratory medication | 0.7453 |
| I always follow the advice of the pharmacy team | 0.6147 |
| The pharmacy team can resolve issues with my respiratory medication | 0.6413 |

Supplementary Table 2: Items of the questionnaire clustered in the ‘patient attention’ domain

| **Patient oriented: attention** | **Factor loading** |
| --- | --- |
| I appreciate it when the pharmacy team calls me to ensure clarity regarding the medications | 0.6864 |
| I appreciate it when the pharmacy team calls me to check on my well-being, beyond my medication usage | 0.7111 |
| Feeling welcomed in the pharmacy has a positive impact on my trust | 0.4794 |
| Having the option to discuss personal matters (e.g., in a separate room) gives me a sense of comfort and satisfaction | 0.4262 |

Supplementary Table 3: Items of the questionnaire clustered in the ‘patient engagement’ domain

| **Patient oriented: Engagement** | **Factor loading** |
| --- | --- |
| The pharmacy team cares about my health | 0.8767 |
| The pharmacy team has my best interests at heart | 0.9103 |
| The pharmacy team gives me the opportunity to ask questions | 0.7703 |
| The pharmacy team pays attention to my issues | 0.8624 |
| I can tell the pharmacy team everything | 0.7524 |
| My trust in the pharmacy team is strengthened when the team is friendly | 0.4682 |

Supplementary Table 4: Items of the questionnaire clustered in the ‘information and communication’ domain

| **Information and communication** | **Factor loading** |
| --- | --- |
| Due to the busyness in the pharmacy, I often struggle to express myself adequately | 0.3806 |
| The pharmacy team is willing to discuss options with me and answer my questions | 0.7293 |
| The pharmacy team prioritizes my health over medication costs | 0.5649 |
| I am open to receiving information from the pharmacy team | 0.4577 |
| The pharmacy team explains well how to use my medications | 0.7400 |
| I understand when the pharmacy team explains to me how to use medication | 0.6474 |
| My trust in the pharmacy team is strengthened when they communicate well with me | 0.3620 |

Supplementary Table 5: Items of the questionnaire clustered in the ‘personal relationship with the pharmacy’ domain

| **Personal relationship with the pharmacy** | **Factor loading** |
| --- | --- |
| My trust in the pharmacy team is strengthened when the team is knowledgeable | 0.3573 |
| The pharmacy team knows who I am | 0.4363 |
| If the pharmacy team wears name tags, it creates a more personal relationship | 0.3943 |
| A more personal relationship with the pharmacy team strengthens my trust in the team | 0.5330 |
| I prefer staying with the same pharmacy for a long time because it allows me to build a better bond with the pharmacy team | 0.8818 |
| A long-term relationship with a pharmacy strengthens my trust in the pharmacy team | 0.8882 |

Supplementary Table 6: Items of the questionnaire clustered in the ‘opinions of peers’ domain

| **Opinions of peers** | **Factor loading** |
| --- | --- |
| If someone I know well says good things about the pharmacy, I gain more trust in the pharmacy | 0.7779 |
| If someone I don't know well says good things about the pharmacy, I gain more trust in the pharmacy | 0.7779 |
